# Supplementary material for: Positioning Accuracy in Holographic Optical Traps
Source: MDPI journal article supplement (doi:10.3390/mi12050559), 2021-05-15
Supplement: s1 [file s1]

# Supplementary Material: Positioning Accuracy in Holographic Optical Traps

Frederic Català-Castro <sup>1,2</sup> and Estela Martín-Badosa <sup>1,2,\*</sup>

<sup>1</sup> Optical Trapping Lab, Grup de Biofotònica (BiOPT), Departament de Física Aplicada, Universitat de Barcelona, 08028 Barcelona, Spain; frederic.catala@icfo.eu

<sup>2</sup> Institut de Nanociència i Nanotecnologia (IN<sup>2</sup>UB), 08028 Barcelona, Spain

\* Correspondence: estela.martinb@ub.edu

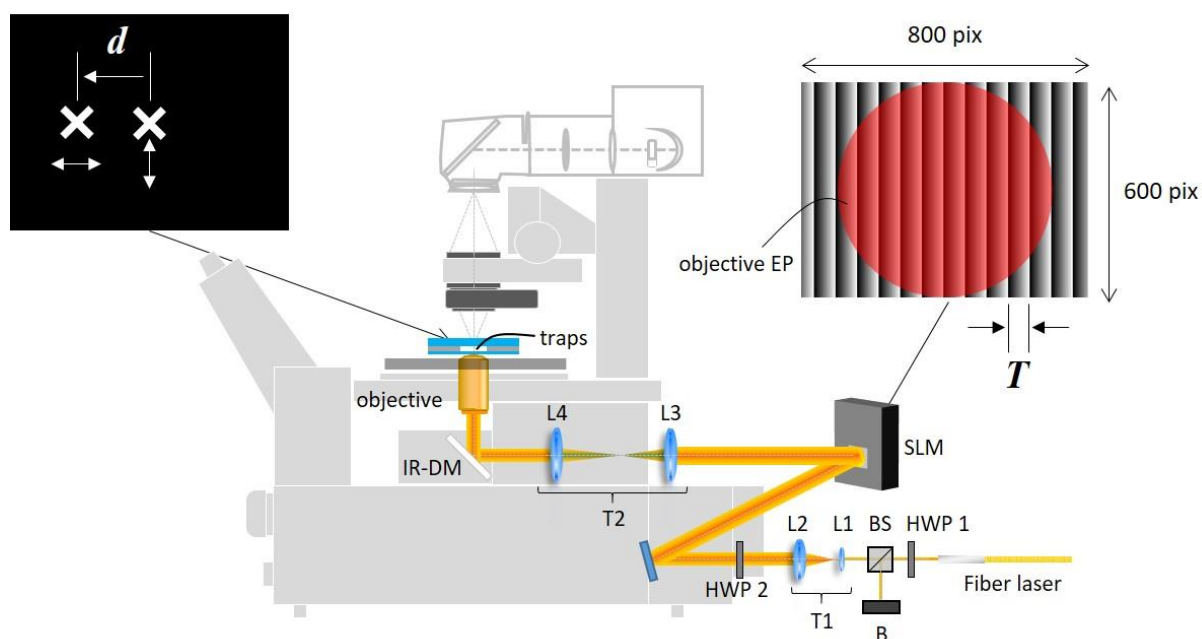

**Figure 1.** Sketch of our holographic optical tweezers (HOT) set-up. Briefly, our SLM is conjugated at the entrance pupil of an NA = 1.2 trapping objective, so the optical field at the trapping plane is related to the SLM through an optical Fourier Transform. HWP: half-wave plate; B: beam block; BS: polarizing beam splitter; L: lens; T: telescope; IR-DM: infrared short-pass dichroic mirror. See manuscript for details.

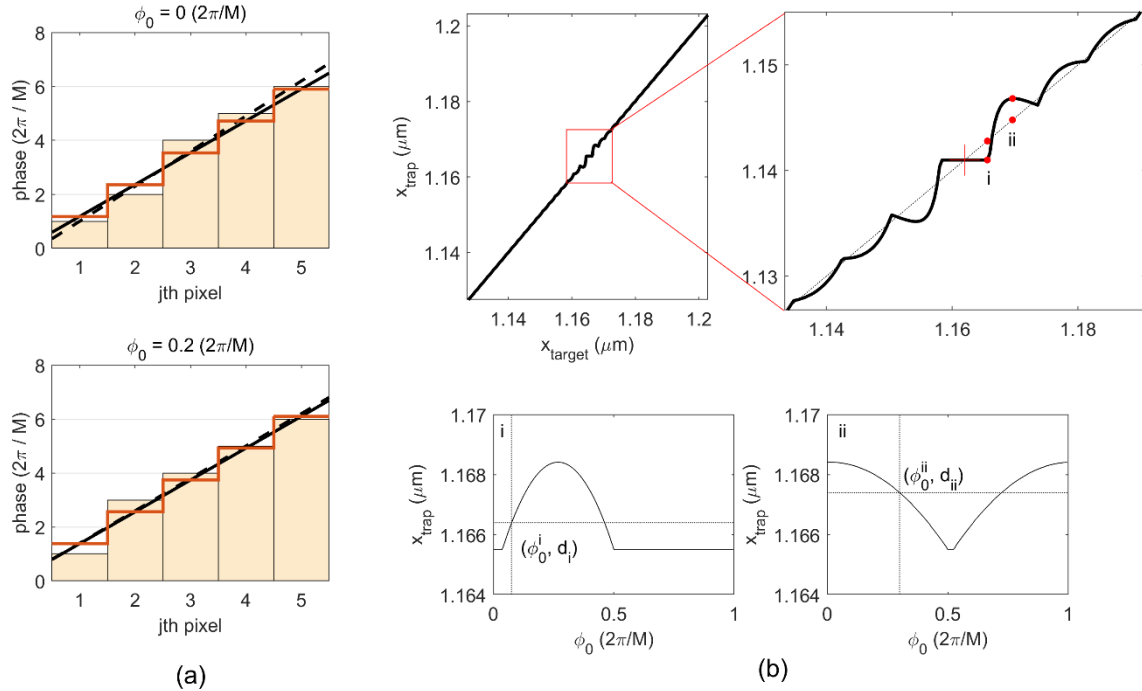

**Figure 2.** Phase quantization effect on trap positioning. **(a)** Hologram with reduced number of pixels ( $N = 5$ ). The black line is the ideal, continuous linear phase profile,  $\phi^{ideal}(x)$ , whereas the dashed line is the average phase profile obtained from the linear fit  $\phi_j = ax_j + b$ . The orange staircase represents the ideal discrete phase values,  $\phi_j^{ideal}$ , and the bar plot corresponds to the nearest phase values,  $\phi_j^{actual}$ , that the hologram takes after phase quantization. Top – slope difference for a non-optimized case. Bottom – after adding an appropriate phase value,  $\phi_0$ , the phase profile approaches the target slope thanks to a change in pixel 2. **(b)** Trap positioning simulated around  $d_{288}^{(1)}$ . Insets i and ii show the variation in positioning around  $d_i$  and  $d_{ii}$  (horizontal, dashed lines) after adding  $\phi_0$ . Phase offsets,  $\phi_0^i$  and  $\phi_0^{ii}$ , optimizing for  $d_i$  and  $d_{ii}$ , respectively, are indicated.
